# Supplementary material for: Kinetics of CO2 electrolysis on composite electrodes consisting of Cu and samaria-doped ceria
Source: Royal Society of Chemistry journal article supplement (doi:10.1039/c8ta09015g), 2018-12-10
Supplement: c8ta09015g1.pdf [file c8ta09015g1.pdf]

## Supplementary Information

### Kinetics for CO<sub>2</sub> Electrolysis on Composite Electrode Consisting of Cu and Samaria Doped Ceria

Taolong Su,<sup>a</sup> Yihang Li,<sup>b</sup> Shuangshuang Xue,<sup>b</sup> Zheqiang Xu,<sup>b</sup> Minghao Zheng<sup>b</sup> and Changrong Xia<sup>\*b, c</sup>

<sup>a</sup>Department of Materials Science, Zhongshan Institute, University of Electronic Science and Technology of China, No. 1 College Road, Shiqi District, Zhongshan, Guangdong Province, 528400, P. R. China

<sup>b</sup>CAS Key Laboratory of Materials for Energy Conversion, Department of Materials Science and Engineering, University of Science and Technology of China, No. 96 Jinzhai Road, Hefei, Anhui Province, 230026, P. R. China. \*E-mail: xiacr@ustc.edu.cn

<sup>c</sup>Energy materials center, Anhui Estone Materials Technology Co. Ltd, No.12 Weigang Road, Bengbu, Anhui Province, 233400, P. R. China

#### Butler-Volmer Equation for CO<sub>2</sub> Electrolysis

The electrolytic reaction on the electrode is show as

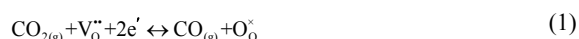

Based on the report in the literature<sup>1</sup>, elementary reaction processes are proposed for CO<sub>2</sub> electrolysis on Cu-SDC electrode as shown in Table 1.

Table 1 Elementary steps for the CO<sub>2</sub> electrolysis reaction at the three phase boundary (TPB) of Cu-SDC composite cathodes.

| Step code                      | Elementary process                                                                                                      |
|--------------------------------|-------------------------------------------------------------------------------------------------------------------------|
| (1) CO <sub>2</sub> adsorption | $\text{CO}_{2(g)} \leftrightarrow \text{CO}_{2(TPB)}$                                                                   |
| (2) Charge transfer            | $\text{CO}_{2(TPB)} + \text{O}_{0(TPB)}^* + \text{e}^- \leftrightarrow (\text{CO}_3)_{0(TPB)}$                          |
| (3) Charge transfer            | $(\text{CO}_3)_{0(TPB)} + \text{V}_{0(TPB)}^{**} + \text{e}^- \leftrightarrow \text{CO}_{(TPB)} + 2\text{O}_{0(TPB)}^*$ |
| (4) Desorption                 | $\text{CO}_{(TPB)} \leftrightarrow \text{CO}_{(g)}$                                                                     |

The derivation of the Butler-Volmer (B-V) equation for the kinetics of reaction (1) comes from the literature reports for the multielectron reaction process<sup>2</sup>. If the elementary step (2) is the rate limiting step, regardless of the mass-transfer effects, B-V equation derived from the elementary step is shown as

$$j=j_0 \left\{ \exp \left[ -\frac{\alpha_1 F \eta}{RT} \right] - \exp \left[ \frac{(2-\alpha_1) F \eta}{RT} \right] \right\} \quad (2)$$

where  $\alpha_1$  is the charge transfer coefficient ( $0 < \alpha_1 < 1$ ),  $j_0$  the exchange current density,  $j$  the net current density,  $\eta$  the overpotential,  $T$  the temperature,  $R$  the gas constant (8.314 J mol<sup>-1</sup> K<sup>-1</sup>) and  $F$  the Faraday constant (96485 A s mol<sup>-1</sup>). If the elementary step (3) is the rate limiting process, B-V equation is

$$j=j_0 \left\{ \exp \left[ -\frac{(1+\alpha_2) F \eta}{RT} \right] - \exp \left[ \frac{(1-\alpha_2) F \eta}{RT} \right] \right\} \quad (3)$$

where  $\alpha_2$  is the charge transfer coefficient ( $0 < \alpha_2 < 1$ ). Comparing eqn (2) and (3), it can be seen that the charge transfer coefficient of the forward current term of the B-V equation of the CO<sub>2</sub> electrolysis reaction is different due to different rate determining step, *i.e.* the former is less than 1, and the latter greater than 1.

Eqn (4) can be used to represent either Eqn (2) or Eqn (3), shown as

$$j=j_0 \left\{ \exp \left[ -\frac{\alpha F \eta}{RT} \right] - \exp \left[ \frac{(2-\alpha) F \eta}{RT} \right] \right\} \quad (4)$$

where  $\alpha$  is the transfer coefficient ( $0 < \alpha < 2$ ). The value of the charge transfer coefficient derived from experiment data can be used to determine which, step (2) or (3) in Table 1, is rate-determining step.

## References

1. M. Zheng, S. Wang, M. Li and C. Xia, *Journal of Power Sources*, 2017, **345**, 165-175.
2. A. J. Bard, L. R. Faulkner, J. Leddy and C. G. Zoski, *Electrochemical methods: fundamentals and applications*, wiley New York, 1980.
